# Supplementary material for: Observational study of effects of HIV acquisition and antiretroviral treatment on biomarkers of systemic immune activation
Source: PubMed Central journal article supplement (PMC11230552; doi:10.1371/journal.pone.0288895), 2024-07-08

Log<sub>10</sub> fold change between two pre-infection time-points in SD units

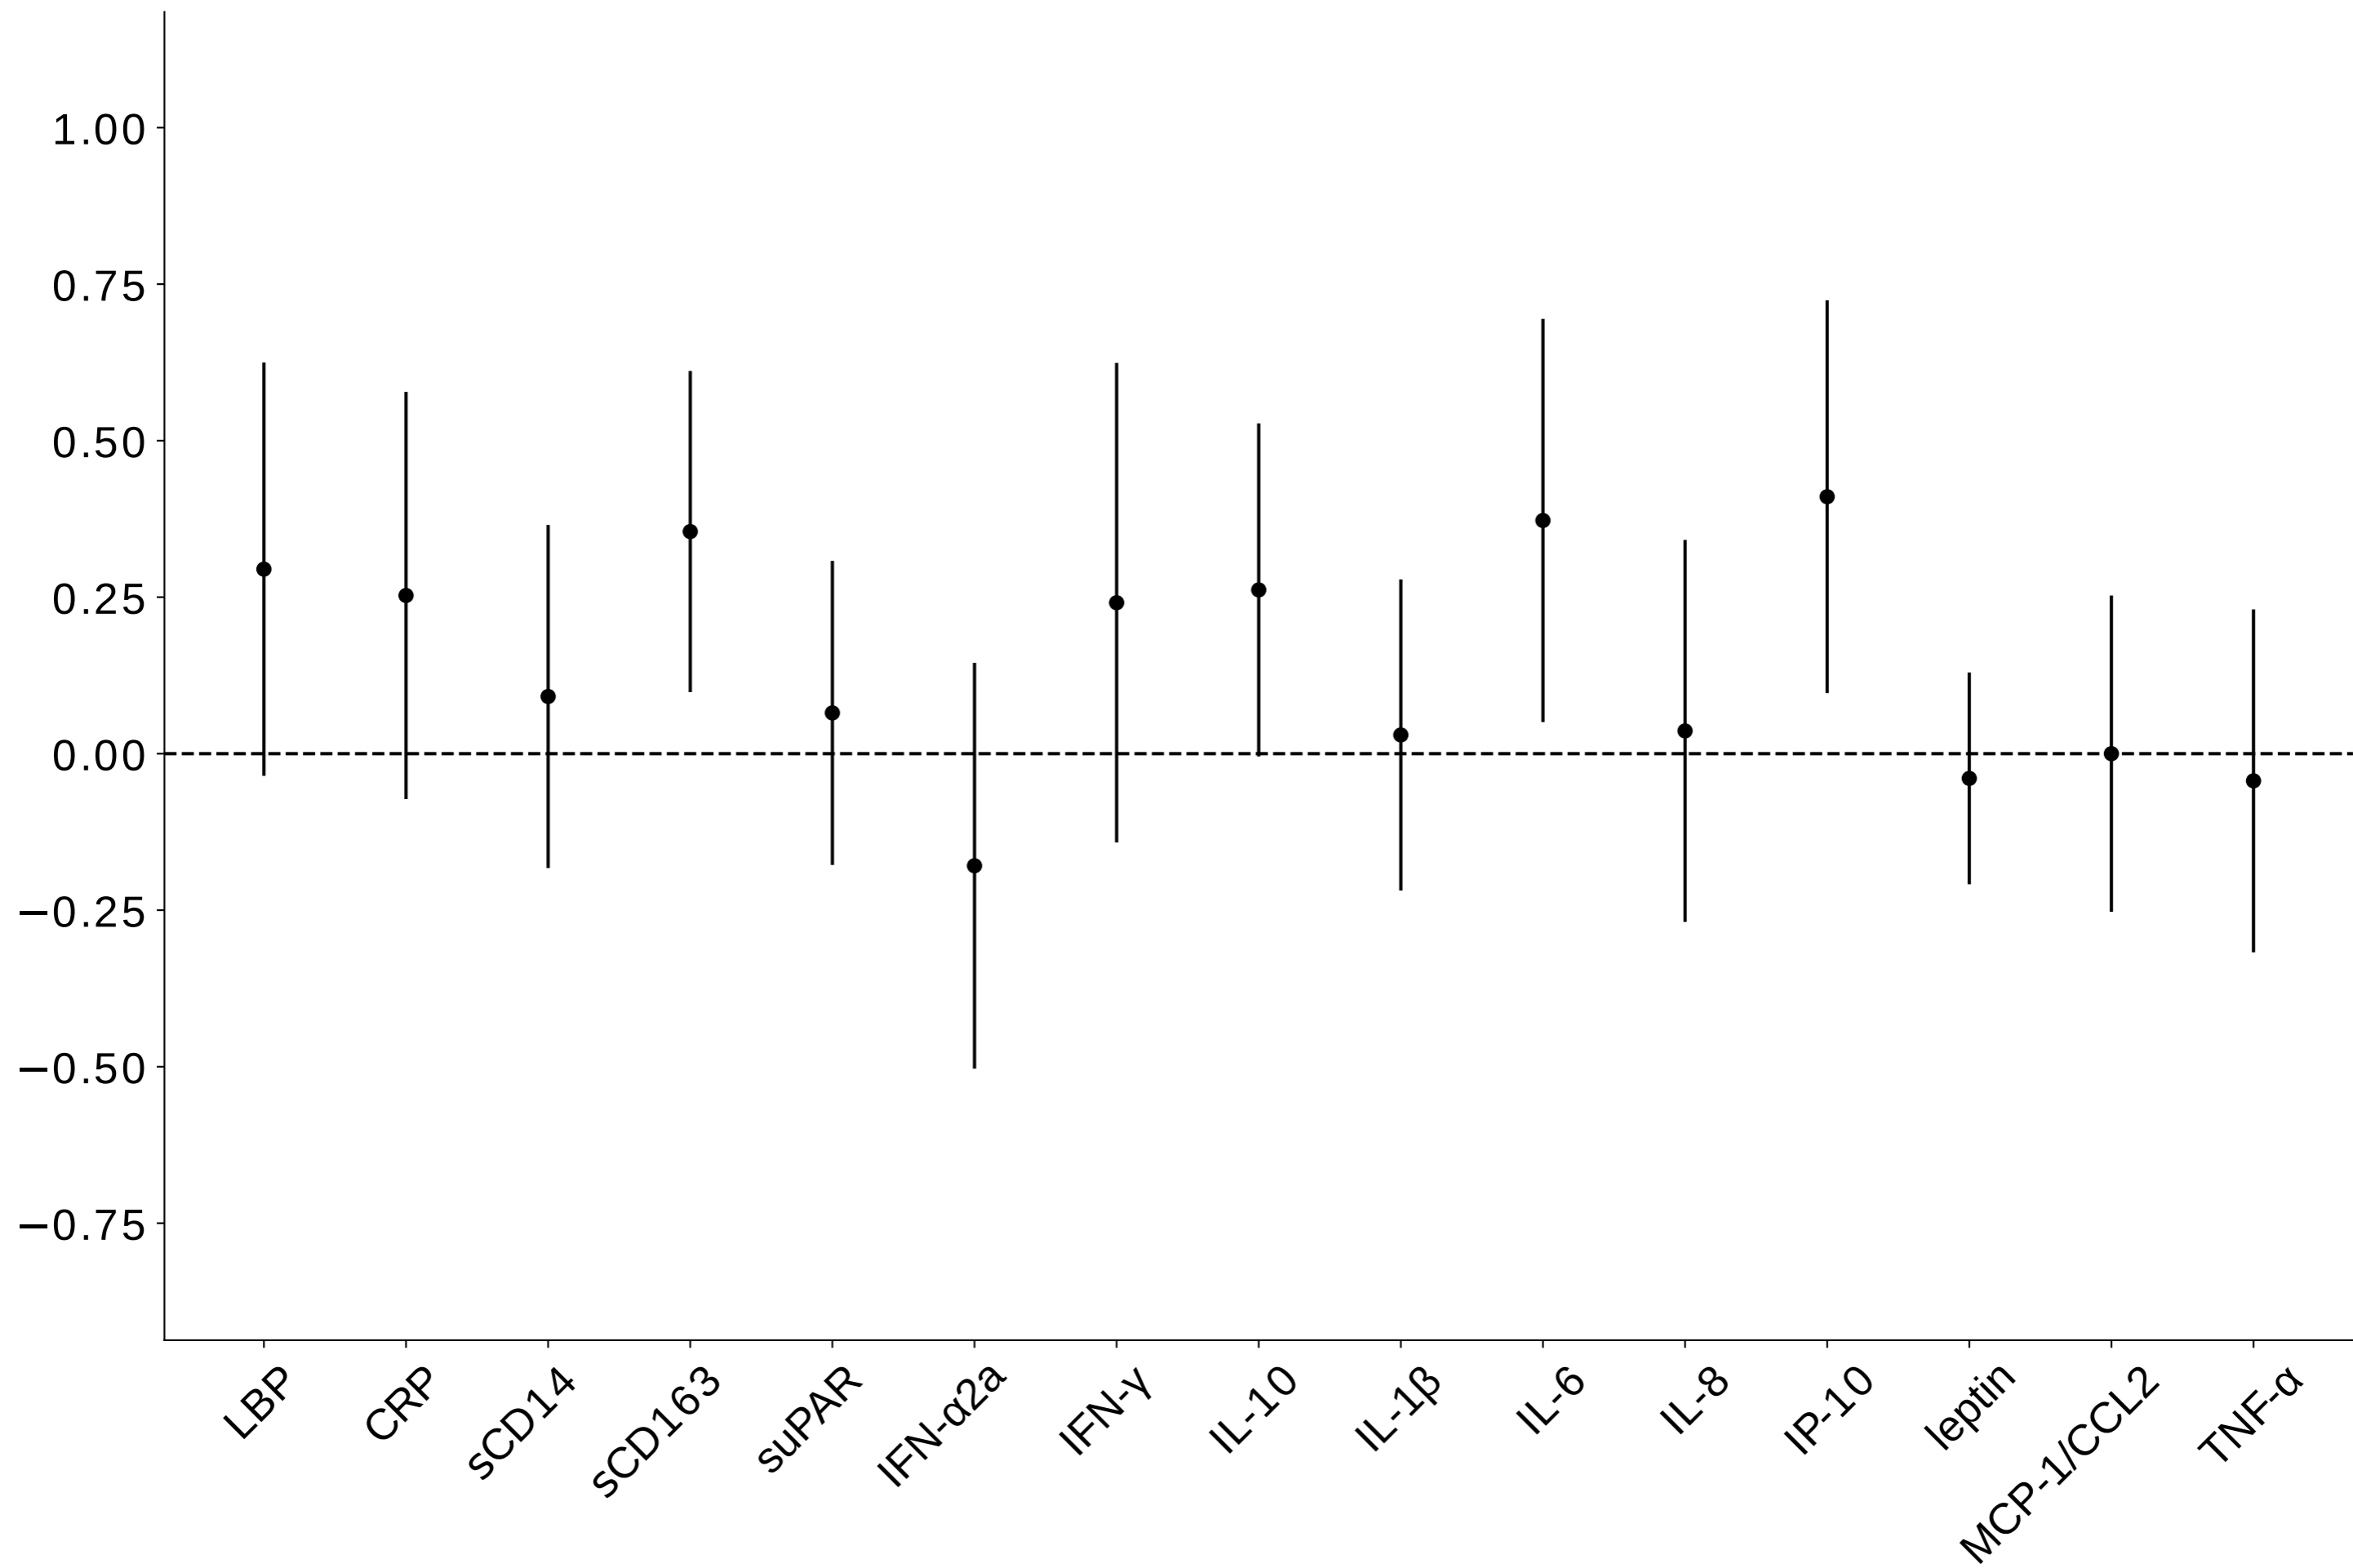

Supplement: pone.0288895.s001.pdf [file pone.0288895.s001.pdf]
